# Supplementary material for: Microplastics and Endocrine Disruptors in Typical Wastewater Treatment Plants in Megacity Shanghai
Source: MDPI journal article supplement (doi:10.3390/toxics12050345), 2024-05-08
Supplement: s1 [file s1]

# **Microplastics and Endocrine Disruptors in Typical Wastewater Treatment Plants in Megacity Shanghai**

**Yuxiao Tong <sup>1</sup>, Manjun Xie <sup>2</sup>, Hanwen Xv <sup>1</sup>, Ruihua Sun <sup>3</sup>, Qian Wang <sup>1,\*</sup> and Juan-ying Li <sup>1</sup>**

**Table S1 List of abbreviations**

| Compound                                   | Acronym |
|--------------------------------------------|---------|
| Wastewater Treatment Plants                | WWTP    |
| Microplastics                              | MPs     |
| Endocrine Disrupting Chemicals             | EDCs    |
| Phenolic Estrogens                         | PEs     |
| Estrogens                                  | SEs     |
| Current-use Pesticides                     | CUPs    |
| Pharmaceuticals and Personal Care Products | PPCPs   |
| Predicted No-observable Concentration      | PNEC    |
| Multiple Reaction Monitoring               | MRM     |
| Measured Concentration                     | MEC     |
| Risk Quotient                              | RQ      |
| Bisphenol A                                | BPA     |
| Nonylphenol                                | NP      |
| Estrone                                    | E1      |
| 17 $\beta$ -Estradiol                      | E2      |
| 17 $\alpha$ -Ethinylestradiol              | EE2     |
| Estriol                                    | E3      |
| Diethylstilbestrol                         | DES     |
| Polyethylene                               | PE      |
| Polypropylene                              | PP      |
| Polyamide                                  | PA      |
| Polyethylene vinyl acetate                 | PEVA    |
| Polyethylene glycol terephthalate.         | PET     |

**Table S2 Instrumental parameters for the target compounds**

|      |                                             |                        |                                    |                       |     |    |     |     |      |     |
|------|---------------------------------------------|------------------------|------------------------------------|-----------------------|-----|----|-----|-----|------|-----|
| EDCs | Ionization mode                             |                        | Positive/negative ionization       |                       |     |    |     |     |      |     |
|      | Liquid chromatography instrument conditions | Flow phase             | A                                  | 0.1% Ammonia solution |     |    |     |     |      |     |
|      |                                             |                        | B                                  | Acetitrile            |     |    |     |     |      |     |
|      |                                             | Elution gradient       | Time (min)                         | 0                     | 0.5 | 2  | 12  | 13  | 13.1 | 15  |
|      |                                             |                        | A (%)                              | 100                   | 50  | 50 | 0   | 0   | 100  | 100 |
|      |                                             |                        | B (%)                              | 0                     | 50  | 50 | 100 | 100 | 0    | 0   |
|      |                                             | Flow rate              | 0.3 mL/min                         |                       |     |    |     |     |      |     |
|      |                                             | Column temperature     | 40 °C                              |                       |     |    |     |     |      |     |
|      | Mass spectrometry instrument conditions     | Dry gas temperature    | 300 °C                             |                       |     |    |     |     |      |     |
|      |                                             | Dry air flow rate      | 7 L/min                            |                       |     |    |     |     |      |     |
|      |                                             | Atomizer pressure      | 3.10 × 10 <sup>5</sup> Pa (45 psi) |                       |     |    |     |     |      |     |
|      |                                             | Sheath air flow rate   | 11 L/min                           |                       |     |    |     |     |      |     |
|      |                                             | Sheath gas temperature | 350 °C                             |                       |     |    |     |     |      |     |
|      |                                             | Capillary voltage      | 3500 V                             |                       |     |    |     |     |      |     |
|      |                                             | Nozzle voltage         | 500 V                              |                       |     |    |     |     |      |     |

**Table S3 Mass spectrum monitoring conditions of target compounds and internal standards**

| contaminant | classes                     | Compound | retention time (min) | CRID    | Precursor (m/z) | Product (m/z) | Fragmentor (V) | Collision Pressure (V) |
|-------------|-----------------------------|----------|----------------------|---------|-----------------|---------------|----------------|------------------------|
| EDCs        | PEs                         | BPA      | 3.2                  | BPA-d14 | 287.2           | 144.9*        | 115            | 40                     |
|             |                             |          |                      |         |                 | 170.9         |                | 32                     |
|             |                             | NP       | 9.7                  | BPA-d14 | 219.3           | 132.9*        | 95             | 36                     |
|             | SEs                         |          |                      |         |                 | 147           |                | 28                     |
|             |                             | E1       | 4.3                  | BPA-d14 | 269.2           | 145*          | 150            | 40                     |
|             |                             |          |                      |         |                 | 183           |                | 40                     |
|             |                             | E2       | 3.5                  | BPA-d14 | 271.2           | 145*          | 100            | 40                     |
|             |                             |          |                      |         |                 | 183           |                | 44                     |
|             |                             | EE2      | 4.0                  | BPA-d14 | 295.3           | 145*          | 45             | 44                     |
|             |                             |          |                      |         |                 | 159           |                | 36                     |
|             |                             | E3       | 1.9                  | BPA-d14 | 287.2           | 144.9*        | 115            | 40                     |
|             |                             |          |                      |         |                 | 170.9         |                | 32                     |
|             |                             | N-SEs    | DES                  | 6.1     | BPA-d14         | 267.2         | 236.9*         | 120                    |
|             |                             |          |                      |         | 251.2           |               | 20             |                        |
|             | Internal Standard Substance | BPA-d14  | 3.1                  | /       | 241.2           | 223*          | 45             | 16                     |
|             |                             |          |                      |         |                 | 142.3         |                | 24                     |

Note: Those with \* are fixed quantum ions of the secondary mass spectrum

**Table S4 Physicochemical properties of the target contaminants**

| Category                            | Compound                      | Acronym | CAS No.    | Formula                                        | MW     | pKa  | logKow |
|-------------------------------------|-------------------------------|---------|------------|------------------------------------------------|--------|------|--------|
| Phenolic estrogenic compounds (PEs) | Bisphenol A                   | BPA     | 80-5-7     | C <sub>15</sub> H <sub>16</sub> O <sub>2</sub> | 228.3  | 10.2 | 3.81   |
| Phenolic estrogenic compounds (PEs) | Nonylphenol                   | NP      | 25154-52-3 | C <sub>15</sub> H <sub>24</sub> O              | 220.3  | 9.8  | 5.66   |
| Steroid estrogens (SEs)             | Estrone                       | E1      | 53-16-7    | C <sub>18</sub> H <sub>22</sub> O <sub>2</sub> | 270.4  | 10.3 | 4.03   |
| Steroid estrogens (SEs)             | 17 $\beta$ -Estradiol         | E2      | 50-28-2    | C <sub>18</sub> H <sub>24</sub> O <sub>2</sub> | 272.4  | 10.3 | 3.57   |
| Steroid estrogens (SEs)             | 17 $\alpha$ -Ethinylestradiol | EE2     | 57-63-6    | C <sub>20</sub> H <sub>24</sub> O <sub>2</sub> | 296.4  | 10.3 | 3.63   |
| Steroid estrogens (SEs)             | Estriol                       | E3      | 50-27-1    | C <sub>18</sub> H <sub>24</sub> O <sub>3</sub> | 288.4  | 10.3 | 2.54   |
| Non-steroid estrogens (N-SEs)       | Diethylstilbestrol            | DES     | 56-53-1    | C <sub>18</sub> H <sub>20</sub> O <sub>2</sub> | 268.15 |      | 5.64   |

**Table S5 The recoveries (%), method detection limits (MDLs), and limits of quantification (LOQs) of the contaminants**

| Contaminants | Internal Standard | R <sup>2</sup> | Recovery (%) | MDLs (µg/L) | LOQs (ng/L) |
|--------------|-------------------|----------------|--------------|-------------|-------------|
| BPA          | BPA-d14           | 0.9993         | 99.2         | 0.075       | 0.023       |
| NP           | BPA-d14           | 0.9996         | 85.6         | 0.369       | 0.111       |
| E1           | BPA-d14           | 0.9992         | 90.8         | 0.814       | 0.244       |
| E2           | BPA-d14           | 0.9988         | 88.5         | 0.476       | 0.143       |
| EE2          | BPA-d14           | 0.9993         | 86.2         | 0.933       | 0.280       |
| E3           | BPA-d14           | 0.9968         | 94.0         | 0.667       | 0.200       |
| DES          | BPA-d14           | 0.9994         | 96.9         | 0.933       | 0.280       |

**Table S6 Ranking of plastic polymers based on hazard classifications of monomers.**

| Polymer                          | Hazard score | Monomer 1 (wt.%)                                                                                          |
|----------------------------------|--------------|-----------------------------------------------------------------------------------------------------------|
| Polypropylene (PP)               | 1 (I)        | Propylene (100 wt.%)<br>Flam. Gas 1 (I)                                                                   |
| Polyethylene terephthalate (PET) | 4 (II)       | Ethylene glycol (39 wt.%)<br>Acute Tox. 4 <sup>o</sup> (II)                                               |
| Ethylene vinyl acetate (PEVA)    | 9 (II)       | Ethylene (80 wt.%)<br>STOT SE 3 <sup>dd</sup> (II), Flam. Gas. 1 (I)                                      |
| Polyacrylic acid (PA)            | 230 (III)    | Acrylic acid (100 wt.%)<br>Aq. Acute 1 (III), Skin Corr. 1A (III), Acute<br>Tox. 4 <sup>o,d,i</sup> (III) |

o,d,i: Toxic by oral, dermal and inhalation route, applies to Acute Tox. categories.

dd: May cause drowsiness or dizziness; rimay cause respiratory irritation, applies to STOT SE 3 classifications.

wt.%: percentage by weight.

**Table S7 PNECs values used in the environmental risk assessment for EDCs**

| Contaminants | fish PNEC (ng/L) | References | Algae PNEC (ng/L) | References |
|--------------|------------------|------------|-------------------|------------|
| BPA          | 60               | [1]        | 1000              | [2]        |
| NP           | 330              | [1]        | 721               | [3]        |
| E1           | 0.078            | [4]        | 570               | [4]        |
| E2           | 1                | [4]        | 2480              | [4]        |
| E3           | 46.2             | [4]        | 208390            | [5]        |



**Table S8 Abundance of MPs with different sizes in different compartments**

| <i>Wet</i>             |                     |      |         |          |       |             |
|------------------------|---------------------|------|---------|----------|-------|-------------|
| Abundance<br>(items/L) |                     | <100 | 100~500 | 500~1000 | ≥1000 | $\sum MP_s$ |
| WWTP-A                 | Influent            | 20   | 26      | 24       | 20    | 93          |
|                        | Primary treatment   | 30   | 23      | 3        | 1     | 57          |
|                        | Secondary treatment | 32   | 16      | 0        | 2     | 50          |
|                        | Tertiary treatment  | 9    | 10      | 7        | 1     | 27          |
|                        | Effluent            | 7    | 7       | 3        | 0     | 17          |
| WWTP-B                 | Influent            | 13   | 88      | 32       | 29    | 163         |
|                        | Primary treatment   | 51   | 27      | 16       | 11    | 105         |
|                        | Secondary treatment | 23   | 20      | 10       | 7     | 60          |
|                        | Tertiary treatment  | 13   | 12      | 1        | 0     | 26          |
|                        | Effluent            | 3    | 9       | 0        | 0     | 13          |
| <i>Dry</i>             |                     |      |         |          |       |             |
| WWTP-A                 | Influent            | 27   | 24      | 5        | 0     | 54          |
|                        | Primary treatment   | 19   | 25      | 7        | 5     | 55          |
|                        | Secondary treatment | 1    | 22      | 9        | 4     | 37          |
|                        | Tertiary treatment  | 8    | 8       | 3        | 2     | 21          |
|                        | Effluent            | 4    | 14      | 1        | 0     | 19          |
| WWTP-B                 | Influent            | 15   | 94      | 18       | 14    | 140         |
|                        | Primary treatment   | 35   | 28      | 15       | 9     | 87          |
|                        | Secondary treatment | 30   | 15      | 5        | 0     | 50          |
|                        | Tertiary treatment  | 1    | 10      | 4        | 0     | 16          |
|                        | Effluent            | 10   | 5       | 1        | 0     | 16          |

**Table S9 Removal efficiencies of MPs with different sizes of each treatment compartment**

| Wet              |             |                   |                     |                    |                    |
|------------------|-------------|-------------------|---------------------|--------------------|--------------------|
| Removal rate (%) |             | Primary treatment | Secondary treatment | Tertiary treatment | Total removal rate |
| WWTP-A           | < 100       | -46.51%           | -8.95%              | 78.62%             | 65.87%             |
|                  | 100~500     | 12.82%            | 28.52%              | 57.79%             | 73.69%             |
|                  | 500~1000    | 85.74%            | 95.06%              | -1640.00%          | 87.75%             |
|                  | $\geq 1000$ | 96.17%            | -95.97%             | 100.00%            | 100.00%            |
|                  | $\sum MP_s$ | 39.46%            | 11.50%              | 66.67%             | 82.14%             |
| WWTP-B           | < 100       | -284.58%          | 54.50%              | 85.48%             | 74.59%             |
|                  | 100~500     | 68.94%            | 27.44%              | 56.44%             | 90.18%             |
|                  | 500~1000    | 50.52%            | 37.89%              | 94.95%             | 98.45%             |
|                  | $\geq 1000$ | 64.02%            | 38.42%              | 95.23%             | 98.94%             |
|                  | $\sum MP_s$ | 35.45%            | 43.33%              | 78.43%             | 92.11%             |
| Dry              |             |                   |                     |                    |                    |
| WWTP-A           | < 100       | 31.78%            | 92.25%              | -207.81%           | 83.73%             |
|                  | 100~500     | -2.19%            | 11.87%              | 37.77%             | 43.96%             |
|                  | 500~1000    | -37.50%           | -27.48%             | 85.51%             | 74.61%             |
|                  | $\geq 1000$ | -2700.00%         | 15.01%              | 100.00%            | 100.00%            |
|                  | $\sum MP_s$ | -3.43%            | 34.04%              | 47.03%             | 63.86%             |
| WWTP-B           | < 100       | -143.19%          | 14.93%              | 66.67%             | 31.03%             |
|                  | 100~500     | 70.56%            | 45.51%              | 66.67%             | 94.65%             |
|                  | 500~1000    | 18.01%            | 66.12%              | 86.67%             | 96.30%             |
|                  | $\geq 1000$ | 32.50%            | 98.24%              | -100.00%           | 97.62%             |
|                  | $\sum MP_s$ | 37.86%            | 42.53%              | 68.00%             | 88.57%             |

**Table S10 Removal rates of different polymers through the WWTPs**

| Removal rate (%) | Polymetric component | Primary treatment | Secondary treatment | Tertiary treatment | Total removal rate |
|------------------|----------------------|-------------------|---------------------|--------------------|--------------------|
| Wet              |                      |                   |                     |                    |                    |
| WWTP-A           | Cellulose            | 100.00%           | 0.00%               | 0.00%              | 99.46%             |
|                  | PET                  | 21.43%            | 31.82%              | 69.78%             | 83.81%             |
|                  | Cellophane           | -100.00%          | 31.82%              | 69.78%             | -100.00%           |
|                  | PEVA                 | 0.00%             | 0.00%               | 0.00%              | 0.00%              |
|                  | PA                   | 0.00%             | 0.00%               | 0.00%              | 0.00%              |
|                  | PP                   | 0.00%             | 0.00%               | -100.00%           | -100.00%           |
|                  | PE                   | 0.00%             | 0.00%               | 0.00%              | 0.00%              |
| WWTP-B           | Cellulose            | -100.00%          | -13.33%             | 99.93%             | 0.00%              |
|                  | PET                  | 99.95%            | 0.00%               | -100.00%           | 89.48%             |
|                  | Cellophane           | 35.45%            | 99.92%              | -100.00%           | 94.74%             |
|                  | PEVA                 | 0.00%             | 0.00%               | 0.00%              | 0.00%              |
|                  | PA                   | 0.00%             | 0.00%               | 0.00%              | 0.00%              |
|                  | PP                   | 0.00%             | 0.00%               | 0.00%              | 0.00%              |
|                  | PE                   | 0.00%             | 0.00%               | 0.00%              | 0.00%              |
| Dry              |                      |                   |                     |                    |                    |
| WWTP-A           | Cellulose            | 99.84%            | 0.00%               | 0.00%              | 99.84%             |
|                  | PET                  | -3.43%            | 34.04%              | 72.60%             | 81.31%             |
|                  | Cellophane           | -100.00%          | 34.04%              | 72.60%             | -100.00%           |
|                  | PEVA                 | 0.00%             | 0.00%               | 0.00%              | 0.00%              |
|                  | PA                   | 0.00%             | 0.00%               | 0.00%              | 0.00%              |
|                  | PP                   | 0.00%             | 0.00%               | -100.00%           | -100.00%           |
|                  | PE                   | 0.00%             | 0.00%               | 0.00%              | 0.00%              |
| WWTP-B           | Cellulose            | -100.00%          | -14.94%             | 99.92%             | 0.00%              |
|                  | PET                  | 99.94%            | 0.00%               | -100.00%           | 84.76%             |
|                  | Cellophane           | 37.86%            | 99.90%              | -100.00%           | 92.38%             |
|                  | PEVA                 | 0.00%             | 0.00%               | 0.00%              | 0.00%              |
|                  | PA                   | 0.00%             | 0.00%               | 0.00%              | 0.00%              |
|                  | PP                   | 0.00%             | 0.00%               | 0.00%              | 0.00%              |
|                  | PE                   | 0.00%             | 0.00%               | 0.00%              | 0.00%              |

**Table S11 Concentrations of different EDCs in different compartments**

| Concentration<br>(ng/L) | Classify    | Chemicals | Influent | Primary<br>treatment | Secondary<br>treatment | Effluent | Total<br>removal rate |
|-------------------------|-------------|-----------|----------|----------------------|------------------------|----------|-----------------------|
| Wet                     |             |           |          |                      |                        |          |                       |
| WWTP-A                  | PEs         | BPA       | 253.34   | 105.77               | 23.3                   | 7.42     | 97.07%                |
|                         |             | NP        | 187.92   | 138.57               | 11.84                  | 8.2      | 95.64%                |
|                         | $\sum PEs$  |           | 441.26   | 244.34               | 35.14                  | 15.62    | 96.46%                |
|                         | SEs         | E1        | 17.98    | 14.07                | 2.19                   | 2.2      | 87.76%                |
|                         |             | E2        | 3.24     | 9.03                 | 1.9                    | 2        | 38.27%                |
|                         |             | E3        | 22.98    | 19.42                | 16.22                  | 13.96    | 39.25%                |
|                         | $\sum SEs$  |           | 44.2     | 42.52                | 20.31                  | 18.16    | 58.91%                |
|                         | $\sum EDCs$ |           | 485.46   | 286.86               | 55.45                  | 33.78    | 93.04%                |
| WWTP-B                  | PEs         | BPA       | 1724.22  | 2814.74              | 197.57                 | 75.63    | 95.61%                |
|                         |             | NP        | 913.67   | 492.16               | 58.93                  | 24.26    | 97.34%                |
|                         | $\sum PEs$  |           | 2637.89  | 3306.9               | 256.5                  | 99.89    | 96.21%                |
|                         | SEs         | E1        | 47.46    | 46.19                | 1.65                   | 0.75     | 98.42%                |
|                         |             | E2        | 6.27     | 4.97                 | 2.97                   | 0.07     | 98.88%                |
|                         |             | E3        | 88.83    | 76.99                | 62.95                  | 48.75    | 45.12%                |
|                         | $\sum SEs$  |           | 142.56   | 128.15               | 67.57                  | 49.57    | 65.23%                |
|                         | $\sum EDCs$ |           | 2780.45  | 3435.06              | 324.08                 | 149.39   | 94.62%                |
| Dry                     |             |           |          |                      |                        |          |                       |
| WWTP-A                  | PEs         | BPA       | 224.91   | 148.07               | 5.74                   | 7.47     | 96.68%                |
|                         |             | NP        | 129.63   | 77.40                | 9.41                   | 10.41    | 91.97%                |
|                         | $\sum PEs$  |           | 129.63   | 77.4                 | 9.41                   | 10.41    | 94.96%                |
|                         | SEs         | E1        | 11.50    | 8.30                 | 2.62                   | 3.92     | 65.91%                |
|                         |             | E2        | 7.71     | 4.83                 | 0.43                   | 0.42     | 94.55%                |
|                         |             | E3        | 8.09     | 8.46                 | 0.10                   | 0.10     | 98.76%                |
|                         | $\sum SEs$  |           | 27.3     | 21.59                | 3.15                   | 4.44     | 83.74%                |
|                         | $\sum EDCs$ |           | 381.85   | 247.06               | 18.21                  | 22.22    | 94.15%                |
| WWTP-B                  | PEs         | BPA       | 57.12    | 312.75               | 3.29                   | 0.79     | 98.62%                |
|                         |             | NP        | 25.66    | 414.07               | 21.52                  | 1.29     | 94.97%                |
|                         | $\sum PEs$  |           | 82.78    | 726.82               | 24.81                  | 2.08     | 97.49%                |
|                         | SEs         | E1        | 6.22     | 15.34                | 2.80                   | 0.30     | 95.18%                |
|                         |             | E2        | 6.61     | 14.22                | 0.48                   | 0.07     | 98.94%                |
|                         |             | E3        | 18.25    | 24.41                | 5.42                   | 0.49     | 97.32%                |
|                         | $\sum SEs$  |           | 31.08    | 53.97                | 8.7                    | 0.86     | 97.23%                |
|                         | $\sum EDCs$ |           | 113.86   | 780.79               | 33.51                  | 2.94     | 97.42%                |

## References

1. Lee, C.-C.; Jiang, L.-Y.; Kuo, Y.-L.; Chen, C.-Y.; Hsieh, C.-Y.; Hung, C.-F.; Tien, C.-J. Characteristics of nonylphenol and bisphenol A accumulation by fish and implications for ecological and human health. *Science of The Total Environment* **2015**, *502*, 417-425, doi:<https://doi.org/10.1016/j.scitotenv.2014.09.042>.
2. Wright-Walters, M.; Volz, C.; Talbott, E.; Davis, D. An updated weight of evidence approach to the aquatic hazard assessment of Bisphenol A and the derivation a new predicted no effect concentration (Pnec) using a non-parametric methodology. *Science of The Total Environment* **2011**, *409*, 676-685, doi:<https://doi.org/10.1016/j.scitotenv.2010.07.092>.
3. Jiang, R.; Liu, J.; Huang, B.; Wang, X.; Luan, T.; Yuan, K. Assessment of the potential ecological risk of residual endocrine-disrupting chemicals from wastewater treatment plants. *Science of The Total Environment* **2020**, *714*, 136689, doi:<https://doi.org/10.1016/j.scitotenv.2020.136689>.
4. Lu, S.; Lin, C.; Lei, K.; Xin, M.; Wang, B.; Ouyang, W.; Liu, X.; He, M. Endocrine-disrupting chemicals in a typical urbanized bay of Yellow Sea, China: Distribution, risk assessment, and identification of priority pollutants. *Environmental Pollution* **2021**, *287*, 117588, doi:<https://doi.org/10.1016/j.envpol.2021.117588>.
5. Czarny, K.; Szczukocki, D.; Krawczyk, B.; Skrzypek, S.; Zieliński, M.; Gadzała-Kopciuch, R. Toxic effects of single animal hormones and their mixtures on the growth of *Chlorella vulgaris* and *Scenedesmus armatus*. *Chemosphere* **2019**, *224*, 93-102, doi:<https://doi.org/10.1016/j.chemosphere.2019.02.072>.
